### 783 Digital Weekend Handover an Effective Documentation

S. Chowdhury<sup>1</sup>, M. Bhandari<sup>1</sup>, S. Quake<sup>2</sup>, I. Ahmed<sup>1</sup>, B. Ibrahim<sup>1</sup>

<sup>1</sup>North Tees Hospital, Stockton, United Kingdom, <sup>2</sup>James Cook University, Middlesborough, United Kingdom

**Aim:** To assess quality of completion for weekend handover for surgical weekend and to plan and design a Digital handover, the implementation and effect of which is studied.

**Method:** Data collection from TRAKCARE for documentation completion criteriae including diagnosis, further investigations to chase (e.g., bloods, imaging), discharge plans, escalation and DNAR status identified.

First cycle collected in August 2020 for pre-implementation status and standard. Second cycle was collected after implementation and raising awareness about new system in October 2020.

Exclusion criteria: patients discharged prior to weekend

**Results:** 32 (10 f 22m) and 22 (9 f 13m) patients were studied in first and second cycle with a respective median length stay of 243 hours and 161.5 hours. Handover entries had improved from 40.6% completion rate to 77.3% these included a diagnosis and management plan. Required blood investigation plans were recorded in 54.5% patients (previously 9.4%). Escalation plans including DNACPR and ceiling of care were improved from 25% to 31%.

**Conclusions:** Digital Medical recording left a gap in documentation for weekend ward rounds when personnels are thinned and busy. To optimize clinical care, the use of a E weekend handover has improved documentation greatly. Future Ongoing project includes improving escalation plans further.
